# Supplementary material for: Machine learning for classifying tuberculosis drug-resistance from DNA sequencing data
Source: PubMed Central journal article supplement — Bioinformatics. 2017 Dec 12;34(10):1666–71. doi: 10.1093/bioinformatics/btx801 (PMC5946815; doi:10.1093/bioinformatics/btx801), 2017-12-12
Supplement: btx801_classifying-resistance-tb-supplement.pdf [file btx801_classifying-resistance-tb-supplement.pdf]

## Supplement A

Table 2. A list of 23 genes. § denotes genes suspected to confer resistance to four first-line anti-TB drugs. Starred genes contain specific loci previously documented in the literature as being associated with drug resistance.

| Genes                  | Function                             | Relevant drug    |
|------------------------|--------------------------------------|------------------|
| §ahpC*                 | Oxidative stress                     | INH              |
| eis*                   | Cell surface involvement             | Aminoglycosides  |
| embA, §embB*,embC,embR | Cell wall biosynthesis               | EMB              |
| §fabG1*                | Fatty acid biosynthesis              | INH              |
| gidB                   | Glucose-inhibited division protein B | Streptomycin     |
| gyrA*,gyrB             | Enzyme for DNA coiling               | Fluoroquinolones |
| §inhA                  | Fatty acid biosynthesis              | INH              |
| §iniA,§iniC            | Likely transmembrane protein         | EMB, INH         |
| §katG                  | Multifunctional enzyme               | INH              |
| §manB                  | GDP-mannose biosynthesis             | EMB              |
| ndh                    | Transfer of electrons                | INH              |
| §pncA*                 | Intermediary metabolism              | PZA              |
| rmlD                   | Sugar biosynthesis                   | EMB              |
| §rpoB*                 | Transcriptional enzyme               | RIF              |
| rpsA                   | Binds mRNA                           |                  |
| rpsL*                  | Translation initiation step          | Streptomycin     |
| rrs                    | Ribosomal RNA 16S                    | Aminoglycosides  |
| tlyA                   | Virulence; methylation               | Aminoglycosides  |

**Supplement B**

Table 3. "-L" SNP Library for Direct Association: 108 resistance-determinants were reported in T. M. Walker et al, 2015. There were 108 resistance-determinants for the interested eight drugs considered in analyses (isolates resistant to AK, CAP, KAN were too few for analysis). \*\*\* stands for omitted long sequence of amino acids that is inserted or deleted. \* stands for a stop.

| SNP               | Drug     | SNP                  | Drug          | SNP               | Drug          |
|-------------------|----------|----------------------|---------------|-------------------|---------------|
| ahpC_C-57T        | INH      | embB_D354A           | EMB           | embB_G406A        | EMB           |
| embB_G406D        | EMB      | embB_G406S           | EMB           | embB_H1002R       | EMB           |
| embB_M306I        | EMB      | embB_M306V           | EMB           | embB_Q497K        | EMB           |
| embB_Q497R        | EMB      | fabG1_C-15T          | INH           | fabG1_G-17T       | INH           |
| fabG1_T-8C        | INH      | gidB_40_delG         | SM            | gidB_101_delC     | SM            |
| gidB_101_delC     | SM       | gidB_A134E           | SM            | gidB_A138T        | SM            |
| gidB_A138V        | SM       | gidB_A200E           | SM            | gidB_A80P         | SM            |
| gidB_G69D         | SM       | gidB_H48N            | SM            | gidB_L91P         | SM            |
| gidB_P75L         | SM       | gidB_R137W           | SM            | gidB_S70N         | SM            |
| gidB_V65G         | SM       | gidB_V88A            | SM            | gyrA_A74S         | CIP           |
| gyrA_A90V         | MOX, OFX | gyrA_D94A            | MOX, OFX      | gyrA_D94G         | CIP, MOX, OFX |
| gyrA_D94N         | MOX, OFX | gyrA_S91P            | CIP, MOX, OFX | inhA_I194T        | INH           |
| inhA_I21T         | INH      | inhA_S94A            | INH           | katG_1349_delG*** | INH           |
| katG_1809_delA*** | INH      | katG_370_delC        | INH           | katG_L159P        | INH           |
| katG_S315N        | INH      | katG_S315T           | INH           | katG_T180K        | INH           |
| katG_V633A        | INH      | katG_W191R           | INH           | katG_W300C        | INH           |
| katG_W328L        | INH      | katG_W90R            | INH           | pncA_76_delG      | PZA           |
| pncA_191_insT     | PZA      | pncA_308_delGTAC     | PZA           | pncA_390_insCC    | PZA           |
| pncA_393_del***   | PZA      | pncA_427_ins***      | PZA           | pncA_469_insT     | PZA           |
| pncA_A-11G        | PZA      | pncA_C138R           | PZA           | pncA_C14R         | PZA           |
| pncA_D12A         | PZA      | pncA_D136N           | PZA           | pncA_D49N         | PZA           |
| pncA_D8G          | PZA      | pncA_D8N             | PZA           | pncA_G132D        | PZA           |
| pncA_G162D        | PZA      | pncA_G78C            | PZA           | pncA_G97D         | PZA           |
| pncA_H57D         | PZA      | pncA_H57R            | PZA           | pncA_K96T         | PZA           |
| pncA_L172P        | PZA      | pncA_L27P            | PZA           | pncA_L4S          | PZA           |
| pncA_Q10*         | PZA      | pncA_Q141*           | PZA           | pncA_S104R        | PZA           |
| pncA_T-12C        | PZA      | pncA_V125G           | PZA           | pncA_V139L        | PZA           |
| pncA_V180F        | PZA      | pncA_V7L             | PZA           | pncA_W68C         | pZA           |
| rpoB_1296_insTTC  | RIF      | rpoB_1326+10_TGGCCCC | RIF           | rpoB_D435F        | RIF           |
| rpoB_D435V        | RIF      | rpoB_H445D           | RIF           | rpoB_H445N        | RIF           |
| rpoB_H445R        | RIF      | rpoB_H445Y           | RIF           | rpoB_I491F        | RIF           |
| rpoB_L452P        | RIF      | rpoB_Q432K           | RIF           | rpoB_S431G        | RIF           |
| rpoB_S450F        | RIF      | rpoB_S450L           | RIF           | rpoB_S450W        | RIF           |
| rpoB_V170G        | RIF      | rpoB_V262A           | RIF           | rpoB_V359A        | RIF           |
| rpsA_A440T        | PZA      | rpsL_K43R            | SM            | rpsL_K88R         | SM            |
| rrs_A514C         | SM       | rrs_C513T            | SM            | rrs_C517T         | SM            |

Note: katG\_1809\_delA\*\*\* denotes katG\_1809\_delACGGGTT; katG\_1349\_delG\*\*\* is katG\_1349\_delGACGAGGTCGTG; pncA\_393\_del\*\*\* is pncA\_393\_delCGACCACAT; pncA\_427\_ins\*\*\* is pncA\_427\_insGCCGTCTGGC

**Supplement C**

Table 4. "-D" SNP Library for Direct Association: Characterisation of mutations previously identified in the literature as resistance-determinants, which was reported in T. M. Walker et al, 2015. The 'literature' was defined as any mutation listed in the Dream TB database project. There were 68 resistance-determinants for the interested eight drugs considered. \* stands for a stop.

| SNP         | Drug          | SNP        | Drug     | SNP         | Drug          |
|-------------|---------------|------------|----------|-------------|---------------|
| embB_D354A  | EMB           | embB_G406A | EMB      | embB_G406D  | EMB           |
| embB_G406S  | EMB           | embB_M306I | EMB      | embB_M306V  | EMB           |
| embB_Q497R  | EMB           | embB_Q497K | EMB      | fabG1_C-15T | INH           |
| fabG1_G-17T | INH           | fabG1_T-8C | INH      | gidB_A134E  | SM            |
| gidB_A200E  | SM            | gidB_A80P  | SM       | gidB_R137W  | SM            |
| gyrA_A74S   | CIP           | gyrA_A90V  | MOX, OFX | gyrA_D94A   | MOX, OFX      |
| gyrA_D94G   | CIP, MOX, OFX | gyrA_D94N  | MOX, OFX | gyrA_S91P   | CIP, MOX, OFX |
| inhA_I194T  | INH           | inhA_I21T  | INH      | inhA_S94A   | INH           |
| katG_S315N  | INH           | katG_S315T | INH      | katG_T180K  | INH           |
| katG_W191R  | INH           | katG_W328L | INH      | pncA_A-11*  | PZA           |
| pncA_C138R  | PZA           | pncA_C14R  | PZA      | pncA_D12A   | PZA           |
| pncA_D136N  | PZA           | pncA_D8N   | PZA      | pncA_G132D  | PZA           |
| pncA_G162D  | PZA           | pncA_G97D  | PZA      | pncA_H57D   | PZA           |
| pncA_K96T   | PZA           | pncA_L172P | PZA      | pncA_L27P   | PZA           |
| pncA_L4S    | PZA           | pncA_Q10*  | PZA      | pncA_Q141*  | PZA           |
| pncA_S104R  | PZA           | pncA_V125G | PZA      | pncA_V139L  | PZA           |
| pncA_V180F  | PZA           | pncA_W68C  | PZA      | rpoB_D435*  | RIF           |
| rpoB_H445D  | RIF           | rpoB_H445N | RIF      | rpoB_H445R  | RIF           |
| rpoB_H445Y  | RIF           | rpoB_I491F | RIF      | rpoB_L452P  | RIF           |
| rpoB_Q432K  | RIF           | rpoB_S431G | RIF      | rpoB_S450D  | RIF           |
| rpoB_S450F  | RIF           | rpoB_S450L | RIF      | rpoB_S450W  | RIF           |
| rpsL_K43R   | SM            | rpsL_K88R  | SM       | rrs_A514C   | SM            |
| rrs_C517T   | SM            | pncA_G97D  | PZA      |             |               |

Supplement D

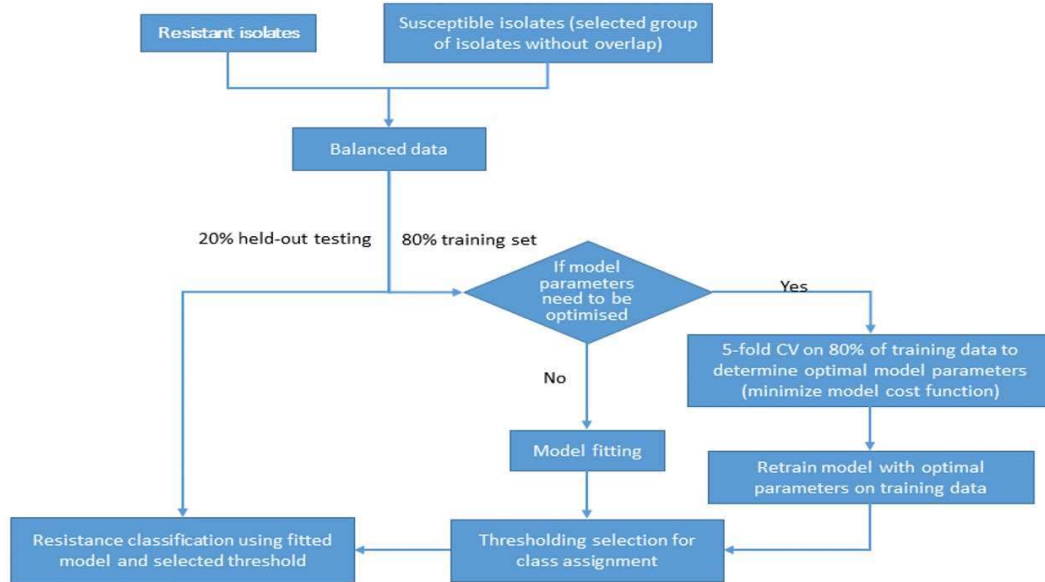

Fig. 4: Flowchart for examined classifiers. There are three main steps shown in the figure: 1) Assembling balanced data sets; 2) Training a classifier; 3) Testing a classifier. In step 1, we randomly divided all susceptible isolates into a series of groups, the number of which equals to the number of resistant isolates, to avoid bias in the classifier. The number of experiments equals to the number of the groups of susceptible isolates with respect to every drug. In step 2, the hyperparameters of the supervised models were determined based on internal five-fold cross-validation on 80% of the training data. The optimised parameters were then used to train a final model using all the training data. The decision threshold was determined as the point on the ROC curve that maximised accuracy. In step 3, the trained model and decision threshold were used for classification on the "held-out" 20% of data in the test set. All performance values were averaged over iterations determined by number ratio of susceptible over resistant isolates.

## Supplement E

Table 5. Classification methods

| Method     | Details                                                                                                                                                                                                                                                                                                                                                                                                                                                                                    |
|------------|--------------------------------------------------------------------------------------------------------------------------------------------------------------------------------------------------------------------------------------------------------------------------------------------------------------------------------------------------------------------------------------------------------------------------------------------------------------------------------------------|
| LR and SVM | LR and SVM-L2 predictive modelling was performed using the LIBLINEAR library Version 2.1. SVM-RBF was performed using the SVM toolbox in Matlab.                                                                                                                                                                                                                                                                                                                                           |
| RF         | A committee of 40-400 weak "base learners", or trees, was built using a random selection of half of the features, which has been found to be a suitable means of initialising the various parameters for the problems involving genomic loci as features. It was performed using the TreeBagger toolbox in Matlab.                                                                                                                                                                         |
| PM         | This model is based on the assumption of independent conditional probability between the input variables. In addition, it uses a Dirichlet and Beta prior on the probability of each class and the probability of features in each class, respectively. A Beta(0.5,0.5) prior was used for every SNP, except for the resistance determinants. For the resistance-determinants, a Beta(1,0.25) prior for the resistant class, and a Beta(0.25,1) prior for the susceptible class, was used. |
| CBMM       | This models each class with a multivariate Bernoulli mixture model and uses Bayes rule to classify. The number of the mixture components in each class was learned in the cross-validation iterations within the training stage using grid search. The new examples were assigned to the class with highest posterior probability.                                                                                                                                                         |

**Supplement F**

Table 6. Confusion table for direct association (DA). -D and -L correspond to the two libraries described in Methods; R and S correspond to resistant and susceptible populations, respectively.

|      |   | INH |      | RIF |      | EMB |      |
|------|---|-----|------|-----|------|-----|------|
|      |   | R   | S    | R   | S    | R   | S    |
| DA-D | R | 245 | 9    | 90  | 28   | 45  | 50   |
|      | S | 21  | 1536 | 7   | 1600 | 2   | 1647 |
| DA-L | R | 248 | 11   | 91  | 28   | 45  | 52   |
|      | S | 18  | 1534 | 6   | 1600 | 2   | 1645 |

  

|      |   | CIP |     | MOX |    | OFX |    |
|------|---|-----|-----|-----|----|-----|----|
|      |   | R   | S   | R   | S  | R   | S  |
| DA-D | R | 23  | 3   | 16  | 4  | 15  | 3  |
|      | S | 3   | 267 | 4   | 65 | 4   | 65 |
| DA-L | R | 23  | 3   | 16  | 4  | 15  | 3  |
|      | S | 3   | 267 | 4   | 65 | 4   | 65 |

  

|      |   | PZA |      | SM |     | MDR |      |
|------|---|-----|------|----|-----|-----|------|
|      |   | R   | S    | R  | S   | R   | S    |
| DA-D | R | 36  | 1    | 22 | 1   | 71  | 6    |
|      | S | 23  | 1665 | 19 | 325 | 10  | 1621 |
| DA-L | R | 41  | 2    | 26 | 4   | 73  | 7    |
|      | S | 18  | 1664 | 15 | 322 | 8   | 1620 |

Supplement G

Table 7. Comparison of predictive performance for INH resistance using all methods with all three feature sets. Sensitivity (sens) and specificity (spec) are shown with AUC, where results are reported as mean and standard error. †represents that p-value is lower than 0.01 (p<0.01). The p-value of performance measurement of the examined classifier compared to the DA-L was obtained by Wilcoxon signed-rank test.

| Methods | F1               |                  |                  | F2        |           |           | F3        |           |           |
|---------|------------------|------------------|------------------|-----------|-----------|-----------|-----------|-----------|-----------|
|         | Sens             | Spec             | AUC              | Sens      | Spec      | AUC       | Sens      | Spec      | AUC       |
| DA-D    | 92 †± 0.3        | 100 ± 0.1        | 96 †± 0.0        | 92 ± 0.3  | 99 ± 0.1  | 96 †± 0.0 | 92 ± 0.4  | 99 ± 0.1  | 96 †± 0.0 |
| DA-L    | 93 ± 0.3         | 99 ± 0.1         | 96 ± 0.0         | 93 ± 0.3  | 99 ± 0.1  | 96 ± 0.0  | 93 ± 0.4  | 99 ± 0.1  | 96 ± 0.0  |
| LR-L1   | 96 †± 0.3        | 97 †± 0.3        | 99 †± 0.1        | 93 ± 0.3  | 99 ± 0.2  | 96 ± 0.1  | 91 †± 0.4 | 99 †± 0.2 | 96 †± 0.0 |
| LR-L2   | 95 †± 0.3        | 96 †± 0.3        | 98 †± 0.1        | 95 †± 0.3 | 97 †± 0.2 | 97 †± 0.0 | 90 †± 0.5 | 99 †± 0.2 | 95 †± 0.0 |
| SVM-L2  | 94 ± 0.4         | 97 †± 0.3        | 98 †± 0.1        | 95 †± 0.3 | 97 †± 0.2 | 97 †± 0.0 | 90 †± 0.5 | 99 †± 0.2 | 95 †± 0.0 |
| SVM-RBF | 96 †± 0.4        | 95 †± 0.4        | 99 †± 0.0        | 96 †± 0.2 | 97 †± 0.3 | 97 †± 0.1 | 91 †± 0.4 | 98 †± 0.3 | 98 †± 0.0 |
| RF      | <b>97 †± 0.3</b> | <b>94 †± 0.4</b> | <b>99 †± 0.0</b> | 95 †± 0.3 | 97 †± 0.2 | 97 †± 0.0 | 92 ± 0.4  | 97 †± 0.3 | 96 †± 0.1 |
| PM      | 96 †± 0.4        | 94 †± 0.4        | 99 †± 0.0        | 96 †± 0.3 | 97 †± 0.2 | 97 †± 0.0 | 94 ± 0.4  | 97 †± 0.3 | 97 †± 0.1 |
| CBMM    | 93 ± 0.4         | 93 †± 0.4        | 97 †± 0.1        | 95 †± 0.3 | 96 †± 0.3 | 98 †± 0.0 | 91 †± 0.5 | 95 †± 0.4 | 97 †± 0.0 |

Table 8. Comparison of predictive performance for RIF resistance using all methods with all three feature sets. Sensitivity (sens) and specificity (spec) are shown with AUC, where results are reported as mean and standard error. †represents that p-value is lower than 0.01 (p<0.01). The p-value of performance measurement of the examined classifier compared to the DA-L was obtained by Wilcoxon signed-rank test.

| Methods | F1        |           |           | F2        |           |           | F3               |                 |                  |
|---------|-----------|-----------|-----------|-----------|-----------|-----------|------------------|-----------------|------------------|
|         | Sens      | Spec      | AUC       | Sens      | Spec      | AUC       | Sens             | Spec            | AUC              |
| DA-D    | 93 ± 0.5  | 98 ± 0.3  | 96 †± 0.1 | 93 ± 0.6  | 99 ± 0.3  | 96 †± 0.1 | 94 ± 0.5         | 98 ± 0.3        | 96 †± 0.1        |
| DA-L    | 94 ± 0.5  | 98 ± 0.3  | 96 ± 0.1  | 94 ± 0.5  | 99 ± 0.3  | 96 ± 0.1  | 95 ± 0.5         | 98 ± 0.3        | 96 ± 0.1         |
| LR-L1   | 96 †± 0.5 | 94 †± 0.6 | 97 †± 0.1 | 94 ± 0.5  | 97 †± 0.5 | 97 †± 0.1 | 95 ± 0.5         | 98 ± 0.3        | 98 †± 0.1        |
| LR-L2   | 91 ± 0.9  | 93 †± 0.7 | 96 ± 0.2  | 96 †± 0.6 | 94 †± 0.6 | 97 †± 0.1 | 92 †± 0.7        | 98 ± 0.3        | 95 †± 0.2        |
| SVM-L2  | 90 ± 1.0  | 92 †± 0.8 | 97 †± 0.2 | 96 ± 0.5  | 94 †± 0.6 | 97 †± 0.1 | 93 ± 0.7         | 98 ± 0.3        | 96 ± 0.2         |
| SVM-RBF | 97 †± 0.4 | 92 †± 0.7 | 98 †± 0.1 | 97 †± 0.4 | 96 †± 0.5 | 98 †± 0.1 | 98 †± 0.3        | 95 †± 0.5       | 98 †± 0.1        |
| RF      | 90 †± 0.9 | 91 †± 0.8 | 97 †± 0.1 | 94 ± 0.5  | 97 ± 0.5  | 98 †± 0.1 | 95 ± 0.5         | 98 ± 0.3        | 93 †± 0.4        |
| PM      | 93 ± 0.7  | 95 †± 0.6 | 98 †± 0.1 | 95 ± 0.4  | 97 ± 0.4  | 99 †± 0.1 | 97 †± 0.4        | 98 ± 0.3        | 98 †± 0.1        |
| CBMM    | 90 †± 0.8 | 91 †± 0.9 | 96 ± 0.1  | 95 ± 0.5  | 97 †± 0.4 | 99 †± 0.1 | <b>97 †± 0.4</b> | <b>97 ± 0.4</b> | <b>99 †± 0.1</b> |

Table 9. Comparison of predictive performance for EMB resistance using all methods with all three feature sets. Sensitivity (sens) and specificity (spec) are shown with AUC, where results are reported as mean and standard error. †represents that p-value is lower than 0.01 (p<0.01). The p-value of performance measurement of the examined classifier compared to the DA-L was obtained by Wilcoxon signed-rank test.

| Methods | F1        |           |           | F2               |                  |                  | F3        |          |           |
|---------|-----------|-----------|-----------|------------------|------------------|------------------|-----------|----------|-----------|
|         | Sens      | Spec      | AUC       | Sens             | Spec             | AUC              | Sens      | Spec     | AUC       |
| DA-D    | 95 ± 0.7  | 97 ± 0.6  | 96 ± 0.1  | 95 ± 0.7         | 98 ± 0.4         | 97 ± 0.1         | 96 ± 0.6  | 97 ± 0.6 | 96 ± 0.1  |
| DA-L    | 95 ± 0.7  | 97 ± 0.6  | 96 ± 0.1  | 95 ± 0.7         | 98 ± 0.4         | 97 ± 0.1         | 96 ± 0.6  | 97 ± 0.6 | 96 ± 0.1  |
| LR-L1   | 91 †± 1.0 | 96 ± 0.6  | 97 ± 0.2  | 94 ± 0.9         | 96 †± 0.7        | 97 ± 0.2         | 93 ± 0.8  | 98 ± 0.5 | 97 †± 0.2 |
| LR-L2   | 88 †± 1.3 | 94 †± 1.0 | 96 ± 0.2  | 96 ± 1.0         | 97 ± 0.6         | 98 †± 0.2        | 95 ± 0.7  | 97 ± 0.7 | 97 †± 0.1 |
| SVM-L2  | 87 †± 1.5 | 94 ± 0.9  | 97 ± 0.2  | 96 ± 0.9         | 97 ± 0.6         | 98 †± 0.2        | 94 ± 0.9  | 97 ± 0.5 | 98 †± 0.2 |
| SVM-RBF | 94 ± 0.9  | 92 †± 0.9 | 98 †± 0.1 | 97 †± 0.7        | 94 †± 0.8        | 98 †± 0.1        | 94 ± 1.1  | 96 ± 0.7 | 96 ± 0.1  |
| RF      | 89 †± 1.2 | 93 †± 0.9 | 97 †± 0.1 | 95 ± 0.9         | 97 ± 0.5         | 99 †± 0.1        | 90 †± 1.3 | 96 ± 0.8 | 84 †± 0.9 |
| PM      | 89 †± 1.3 | 95 ± 0.8  | 98 †± 0.1 | 96 †± 1.1        | 97 ± 0.6         | 99 †± 0.1        | 91 †± 1.1 | 98 ± 0.6 | 97 †± 0.2 |
| CBMM    | 88 †± 1.4 | 93 †± 0.9 | 97 †± 0.1 | <b>97 †± 1.0</b> | <b>96 †± 0.6</b> | <b>99 †± 0.1</b> | 91 †± 1.0 | 97 ± 0.6 | 97 ± 0.2  |

Table 10. Comparison of predictive performance for PZA resistance using all methods with all three feature sets. Sensitivity (sens) and specificity (spec) are shown with AUC, where results are reported as mean and standard error. †represents that p-value is lower than 0.01 (p<0.01). The p-value of performance measurement of the examined classifier compared to the DA-L was obtained by Wilcoxon signed-rank test.

| Methods | F1               |                  |                  | F2        |           |           | F3        |           |           |
|---------|------------------|------------------|------------------|-----------|-----------|-----------|-----------|-----------|-----------|
|         | Sens             | Spec             | AUC              | Sens      | Spec      | AUC       | Sens      | Spec      | AUC       |
| DA-D    | 57 †± 1.5        | 100 ± 0.0        | 79 †± 0.0        | 59 †± 1.4 | 100 ± 0.0 | 79 †± 0.0 | 57 †± 1.4 | 100 ± 0.0 | 79 †± 0.0 |
| DA-L    | 69 ± 1.4         | 100 ± 0.0        | 85 ± 0.0         | 70 ± 1.4  | 100 ± 0.0 | 85 ± 0.0  | 69 ± 1.3  | 100 ± 0.0 | 85 ± 0.0  |
| LR-L1   | 82 †± 1.2        | 88 †± 1.1        | 90 †± 0.2        | 81 †± 1.3 | 93 †± 0.8 | 88 †± 0.3 | 50 †± 1.4 | 100 ± 0.0 | 75 †± 0.2 |
| LR-L2   | 80 †± 1.3        | 87 †± 1.2        | 89 †± 0.3        | 88 †± 1.0 | 89 †± 1.0 | 90 †± 0.2 | 50 †± 1.4 | 100 ± 0.0 | 75 †± 0.2 |
| SVM-L2  | 80 †± 1.6        | 88 †± 1.0        | 90 †± 0.3        | 87 †± 1.1 | 89 †± 1.0 | 90 †± 0.2 | 50 †± 1.4 | 100 ± 0.0 | 75 †± 0.2 |
| SVM-RBF | 89 †± 1.1        | 85 †± 1.3        | 94 †± 0.2        | 89 †± 1.0 | 88 †± 1.1 | 92 †± 0.2 | 75 †± 1.5 | 98 †± 0.4 | 88 †± 0.2 |
| RF      | 81 †± 1.2        | 87 †± 1.2        | 92 †± 0.2        | 85 †± 1.1 | 90 †± 0.9 | 89 †± 0.2 | 50 †± 1.4 | 100 ± 0.0 | 71 †± 0.3 |
| PM      | <b>84 †± 1.2</b> | <b>90 †± 1.1</b> | <b>95 †± 0.2</b> | 90 †± 1.1 | 90 †± 0.9 | 93 †± 0.2 | 72 ± 1.3  | 100 ± 0.1 | 87 †± 0.1 |
| CBMM    | 82 †± 1.2        | 87 †± 1.1        | 93 †± 0.2        | 88 †± 1.1 | 90 †± 0.9 | 93 †± 0.2 | 75 †± 1.5 | 98 †± 0.4 | 87 †± 0.1 |

Table 11. Comparison of predictive performance for CIP resistance using all methods with all three feature sets. Sensitivity (sens) and specificity (spec) are shown with AUC, where results are reported as mean and standard error. †represents that p-value is lower than 0.01 (p<0.01). The p-value of performance measurement of the examined classifier compared to the DA-L was obtained by Wilcoxon signed-rank test.

| Methods | F1       |           |           | F2               |                 |                  | F3       |           |           |
|---------|----------|-----------|-----------|------------------|-----------------|------------------|----------|-----------|-----------|
|         | Sens     | Spec      | AUC       | Sens             | Spec            | AUC              | Sens     | Spec      | AUC       |
| DA-D    | 87 ± 1.0 | 99 ± 0.4  | 94 ± 0.1  | 88 ± 1.1         | 99 ± 0.3        | 94 ± 0.1         | 88 ± 1.0 | 99 ± 0.3  | 94 ± 0.1  |
| DA-L    | 87 ± 1.0 | 99 ± 0.4  | 94 ± 0.1  | 88 ± 1.1         | 99 ± 0.3        | 94 ± 0.1         | 88 ± 1.0 | 99 ± 0.3  | 94 ± 0.1  |
| LR-L1   | 88 ± 1.4 | 94 †± 0.8 | 96 †± 0.3 | 89 ± 1.3         | 95 †± 0.9       | 93 †± 0.3        | 86 ± 1.4 | 94 †± 1.0 | 96 †± 0.3 |
| LR-L2   | 87 ± 1.5 | 98 ± 0.5  | 94 †± 0.5 | 92 ± 1.2         | 96 †± 0.8       | 94 ± 0.3         | 87 ± 1.5 | 93 †± 1.0 | 95 †± 0.5 |
| SVM-L2  | 85 ± 1.4 | 98 ± 0.7  | 96 †± 0.4 | 92 ± 1.1         | 96 †± 0.7       | 94 ± 0.4         | 87 ± 1.5 | 94 †± 1.0 | 95 †± 0.4 |
| SVM-RBF | 86 ± 1.5 | 99 ± 0.5  | 97 †± 0.3 | 92 †± 1.6        | 91 †± 1.3       | 98 †± 0.2        | 85 ± 1.6 | 91 †± 1.6 | 93 ± 0.5  |
| RF      | 87 ± 1.4 | 92 †± 1.2 | 88 †± 1.0 | 95 †± 1.1        | 99 ± 0.5        | 96 †± 0.4        | 86 ± 1.4 | 93 †± 1.1 | 93 ± 0.5  |
| PM      | 88 ± 1.4 | 96 ± 1.1  | 97 †± 0.3 | <b>96 †± 0.9</b> | <b>98 ± 0.4</b> | <b>98 †± 0.3</b> | 89 ± 1.5 | 95 †± 1.0 | 97 †± 0.3 |
| CBMM    | 86 ± 1.6 | 96 ± 1.1  | 95 †± 0.3 | 95 †± 1.1        | 95 †± 0.8       | 98 †± 0.1        | 86 ± 1.4 | 94 †± 1.0 | 96 †± 0.3 |

Table 12. Comparison of predictive performance for MOX resistance using all methods with all three feature sets. Sensitivity (sens) and specificity (spec) are shown with AUC, where results are reported as mean and standard error. †represents that p-value is lower than 0.01 (p<0.01). The p-value of performance measurement of the examined classifier compared to the DA-L was obtained by Wilcoxon signed-rank test.

| Methods | F1        |           |           | F2        |           |           | F3               |                 |                  |
|---------|-----------|-----------|-----------|-----------|-----------|-----------|------------------|-----------------|------------------|
|         | Sens      | Spec      | AUC       | Sens      | Spec      | AUC       | Sens             | Spec            | AUC              |
| DA-D    | 83 ± 1.4  | 93 ± 0.8  | 87 ± 0.1  | 80 ± 1.5  | 93 ± 0.9  | 87 ± 0.1  | 79 ± 1.6         | 96 ± 0.7        | 87 ± 0.2         |
| DA-L    | 83 ± 1.4  | 93 ± 0.8  | 87 ± 0.1  | 80 ± 1.5  | 93 ± 0.9  | 87 ± 0.1  | 79 ± 1.6         | 96 ± 0.7        | 87 ± 0.2         |
| LR-L1   | 70 †± 1.8 | 91 ± 1.1  | 87 ± 0.6  | 73 †± 1.9 | 88 ± 1.7  | 79 †± 0.7 | 88 †± 1.7        | 90 †± 1.1       | 91 †± 0.6        |
| LR-L2   | 69 †± 1.9 | 84 †± 1.7 | 80 †± 0.8 | 78 ± 1.8  | 85 †± 1.8 | 80 †± 0.6 | 90 †± 1.6        | 90 †± 1.2       | 87 ± 0.9         |
| SVM-L2  | 69 †± 1.8 | 86 †± 1.4 | 83 †± 0.6 | 76 ± 2.0  | 85 †± 1.9 | 79 †± 0.6 | 91 †± 1.4        | 91 †± 1.2       | 90 †± 0.7        |
| SVM-RBF | 64 †± 2.3 | 96 †± 0.8 | 85 ± 0.7  | 62 †± 2.7 | 94 ± 1.0  | 88 †± 0.6 | 89 †± 2.1        | 84 †± 1.6       | 93 †± 0.5        |
| RF      | 71 †± 2.1 | 84 †± 1.7 | 77 †± 1.0 | 80 ± 1.8  | 90 ± 1.4  | 85 ± 0.5  | 90 †± 1.6        | 90 †± 1.3       | 88 ± 0.8         |
| PM      | 74 †± 2.1 | 87 ± 1.8  | 89 †± 0.4 | 85 ± 1.7  | 88 ± 1.6  | 88 †± 0.4 | <b>95 †± 1.4</b> | <b>93 ± 1.0</b> | <b>95 †± 0.4</b> |
| CBMM    | 71 †± 2.1 | 87 ± 1.8  | 87 ± 0.5  | 79 ± 1.9  | 85 †± 1.8 | 85 ± 0.6  | 88 †± 1.8        | 90 †± 1.3       | 92 †± 0.5        |



Table 13. Comparison of predictive performance for OFX resistance using all methods with all three feature sets. Sensitivity (sens) and specificity (spec) are shown with AUC, where results are reported as mean and standard error. †represents that p-value is lower than 0.01 (p<0.01). The p-value of performance measurement of the examined classifier compared to the DA-L was obtained by Wilcoxon signed-rank test.

| Methods | F1         |            |            | F2         |            |            | F3                |                 |                   |
|---------|------------|------------|------------|------------|------------|------------|-------------------|-----------------|-------------------|
|         | Sens       | Spec       | AUC        | Sens       | Spec       | AUC        | Sens              | Spec            | AUC               |
| DA-D    | 81 ± 1.5   | 95 ± 0.9   | 87 ± 0.3   | 77 ± 1.4   | 96 ± 0.9   | 87 ± 0.3   | 78 ± 1.5          | 95 ± 1.1        | 87 ± 0.3          |
| DA-L    | 81 ± 1.5   | 95 ± 0.9   | 87 ± 0.3   | 77 ± 1.4   | 96 ± 0.9   | 87 ± 0.3   | 78 ± 1.5          | 95 ± 1.1        | 87 ± 0.3          |
| LR-L1   | 67 † ± 2.2 | 90 ± 1.6   | 83 † ± 0.7 | 75 ± 1.8   | 86 † ± 2.0 | 80 † ± 0.7 | 85 † ± 2.3        | 91 † ± 1.2      | 91 † ± 0.6        |
| LR-L2   | 64 † ± 2.2 | 78 † ± 2.2 | 75 † ± 0.8 | 79 ± 1.7   | 86 † ± 2.0 | 80 † ± 0.6 | 86 † ± 2.0        | 92 ± 1.2        | 82 ± 1.5          |
| SVM-L2  | 62 † ± 2.2 | 82 † ± 2.1 | 77 † ± 0.8 | 80 ± 1.8   | 84 † ± 2.2 | 80 † ± 0.7 | 87 † ± 2.1        | 93 ± 1.2        | 85 ± 1.1          |
| SVM-RBF | 63 † ± 2.3 | 87 ± 2.5   | 78 † ± 0.6 | 75 ± 2.3   | 89 † ± 2.0 | 86 ± 0.9   | 92 † ± 2.1        | 78 † ± 2.7      | 93 † ± 0.7        |
| RF      | 65 † ± 2.3 | 76 † ± 2.3 | 69 † ± 1.3 | 81 ± 1.7   | 88 † ± 1.8 | 84 † ± 0.5 | 88 † ± 2.0        | 90 † ± 1.3      | 88 ± 0.9          |
| PM      | 63 † ± 2.2 | 89 † ± 1.6 | 83 † ± 0.9 | 84 † ± 1.5 | 89 † ± 1.9 | 86 ± 0.6   | <b>96 † ± 1.4</b> | <b>92 ± 1.3</b> | <b>95 † ± 0.5</b> |
| CBMM    | 62 † ± 2.3 | 85 † ± 2.3 | 79 † ± 0.7 | 79 ± 1.9   | 81 † ± 2.5 | 85 ± 0.7   | 85 † ± 2.0        | 89 † ± 1.5      | 92 † ± 0.6        |

Table 14. Comparison of predictive performance for SM resistance using all methods with all three feature sets. Sensitivity (sens) and specificity (spec) are shown with AUC, where results are reported as mean and standard error. †represents that p-value is lower than 0.01 (p<0.01). The p-value of performance measurement of the examined classifier compared to the DA-L was obtained by Wilcoxon signed-rank test.

| Methods | F1         |            |            | F2                |                   |                   | F3         |             |            |
|---------|------------|------------|------------|-------------------|-------------------|-------------------|------------|-------------|------------|
|         | Sens       | Spec       | AUC        | Sens              | Spec              | AUC               | Sens       | Spec        | AUC        |
| DA-D    | 52 † ± 2.0 | 99 ± 0.5   | 77 † ± 0.0 | 56 † ± 2.0        | 100 ± 0.2         | 77 † ± 0.0        | 52 † ± 1.6 | 100 † ± 0.1 | 77 † ± 0.0 |
| DA-L    | 63 ± 1.8   | 98 ± 0.6   | 81 ± 0.1   | 65 ± 1.8          | 99 ± 0.4          | 81 ± 0.1          | 62 ± 1.5   | 99 ± 0.4    | 81 ± 0.1   |
| LR-L1   | 83 † ± 1.2 | 88 † ± 1.1 | 89 † ± 0.4 | 76 † ± 1.6        | 94 † ± 0.8        | 86 † ± 0.3        | 59 ± 1.7   | 93 † ± 1.1  | 72 † ± 0.3 |
| LR-L2   | 85 † ± 1.2 | 89 † ± 1.1 | 88 † ± 0.3 | 81 † ± 1.5        | 92 † ± 1.0        | 88 † ± 0.1        | 61 ± 1.6   | 89 † ± 1.2  | 74 † ± 0.5 |
| SVM-L2  | 84 † ± 1.3 | 88 † ± 1.2 | 88 † ± 0.3 | 81 † ± 1.6        | 92 † ± 1.0        | 88 † ± 0.2        | 60 ± 1.7   | 90 † ± 1.1  | 73 † ± 0.4 |
| SVM-RBF | 80 † ± 1.3 | 86 † ± 1.5 | 91 † ± 0.3 | <b>87 † ± 1.5</b> | <b>90 † ± 1.0</b> | <b>91 † ± 0.3</b> | 73 † ± 1.9 | 80 † ± 1.5  | 81 ± 0.3   |
| RF      | 85 † ± 1.2 | 89 † ± 1.2 | 87 † ± 0.3 | 81 † ± 1.5        | 92 † ± 0.9        | 86 † ± 0.2        | 60 ± 1.8   | 86 † ± 1.3  | 66 † ± 0.7 |
| PM      | 86 † ± 1.1 | 87 † ± 1.3 | 89 † ± 0.2 | 84 † ± 1.5        | 92 † ± 0.9        | 91 † ± 0.2        | 76 † ± 1.4 | 80 † ± 1.4  | 84 † ± 0.3 |
| CBMM    | 83 † ± 1.6 | 83 † ± 1.7 | 89 † ± 0.3 | 85 † ± 1.4        | 91 † ± 1.0        | 91 † ± 0.3        | 66 ± 1.8   | 78 † ± 1.8  | 77 † ± 0.3 |

Table 15. Comparison of predictive performance for MDR using all methods with all three feature sets. Sensitivity (sens) and specificity (spec) are shown with AUC, where results are reported as mean and standard error. †represents that p-value is lower than 0.01 (p<0.01). The p-value of performance measurement of the examined classifier compared to the DA-L was obtained by Wilcoxon signed-rank test.

| Methods | F1         |            |            | F2         |            |            | F3                |                   |                    |
|---------|------------|------------|------------|------------|------------|------------|-------------------|-------------------|--------------------|
|         | Sens       | Spec       | AUC        | Sens       | Spec       | AUC        | Sens              | Spec              | AUC                |
| DA-D    | 88 ± 0.8   | 100 ± 0.2  | 94 † ± 0.0 | 87 ± 0.9   | 100 ± 0.2  | 94 † ± 0.0 | 87 ± 0.8          | 100 ± 0.1         | 94 † ± 0.0         |
| DA-L    | 90 ± 0.7   | 100 ± 0.2  | 95 ± 0.0   | 90 ± 0.7   | 99 ± 0.2   | 95 ± 0.0   | 90 ± 0.7          | 100 ± 0.2         | 95 ± 0.0           |
| LR-L1   | 96 † ± 0.6 | 96 † ± 0.5 | 98 † ± 0.1 | 96 † ± 0.7 | 95 † ± 0.7 | 98 † ± 0.1 | 96 † ± 0.7        | 96 † ± 0.6        | 97 † ± 0.1         |
| LR-L2   | 91 ± 0.9   | 95 † ± 0.5 | 97 † ± 0.1 | 98 † ± 0.4 | 94 † ± 0.6 | 97 † ± 0.1 | 96 † ± 0.7        | 96 † ± 0.6        | 97 † ± 0.1         |
| SVM-L2  | 90 ± 1.1   | 95 † ± 0.6 | 97 † ± 0.1 | 97 † ± 0.6 | 94 † ± 0.7 | 98 † ± 0.1 | 95 † ± 0.7        | 96 † ± 0.5        | 97 † ± 0.1         |
| SVM-RBF | 97 † ± 0.6 | 92 † ± 0.7 | 99 † ± 0.1 | 97 † ± 0.6 | 93 † ± 0.7 | 99 † ± 0.1 | 98 † ± 0.5        | 94 † ± 0.7        | 99 † ± 0.0         |
| RF      | 92 ± 0.8   | 91 † ± 0.7 | 97 † ± 0.1 | 96 † ± 0.8 | 95 † ± 0.6 | 99 † ± 0.1 | 94 † ± 0.8        | 96 † ± 0.6        | 97 † ± 0.2         |
| PM      | 94 † ± 0.9 | 94 † ± 0.7 | 98 † ± 0.1 | 94 † ± 0.7 | 96 † ± 0.6 | 99 † ± 0.1 | <b>96 † ± 0.6</b> | <b>98 † ± 0.5</b> | <b>100 † ± 0.1</b> |
| CBMM    | 90 ± 1.1   | 92 † ± 0.7 | 96 † ± 0.1 | 96 † ± 0.8 | 94 † ± 0.6 | 99 † ± 0.0 | 95 † ± 0.7        | 96 † ± 0.5        | 99 † ± 0.1         |

**Supplement H**

Table 16. Resistance-conferring mutation candidates, with the number of false negative isolates (the susceptible isolates that were classified to be resistant by all machine learning classifiers) harboring the mutation,  $n_{fn}$ , followed by  $n_{res}$  in parenthesis, which indicates that in addition to the noted number of false negative isolates with the mutation, the number resistant isolate containing an established mutation also shared the mutation. These candidates are defined as those (a) found in at least two isolates resistant to the given drug, (b) found in at least one isolate lacking any alternative established resistance-conferring mutation, and (c) having a positive predictive value of 1.0 (i.e., every isolate with the SNP was classified as drug-resistant by all machine learning classifiers).

| Drug | SNPs           | $n_{fn}(n_{res})$ | Drug        | SNPs             | $n_{fn}(n_{res})$ |
|------|----------------|-------------------|-------------|------------------|-------------------|
| INH  | katG_1899_insG | 2(2)              | RIF         | rpoB_1298_ins*** | 3(3)              |
| PZA  | ahpC_T-42C     | 2(5)              | CIP,MOX,OFX | katG_V473L       | 3(14)             |
|      | gidB_A27B      | 2(2)              |             |                  |                   |
|      | gyrA_S91P      | 3(4)              |             |                  |                   |
|      | rpoB_L452P     | 2(5)              |             |                  |                   |

Note: rpoB\_1298\_ins\*\*\* denotes rpoB\_1298\_insCTTCATGGACCAGAAC

**Supplement I**

Table 17. Comparing performance between best classifier and DA-L for resistance prediction with 8 drugs and MDR-TB within subclade C1 ( Beijing, EuroAmer, LAM, Tur and Uganda.) Sensitivity (sens) and specificity (spec) are shown with AUC, where results are reported as mean and standard error. † represents that p-value is lower than 0.01 (p<0.01). The p-value of performance measurement of the examined classifier compared to the DA-L was obtained by Wilcoxon signed-rank test.

| Drug | Clades    | DA       |           |          | (Feature set) | Best classifier |            |             |
|------|-----------|----------|-----------|----------|---------------|-----------------|------------|-------------|
|      |           | Sens     | Spec      | AUC      |               | Sens            | Spec       | AUC         |
| INH  | C1        | 93 ± 0.5 | 100 ± 0.2 | 96 ± 0.0 | PM(F1)        | 96 † ± 0.6      | 94 † ± 0.6 | 99 † ± 0.0  |
|      | Delhi_CAS | 96 ± 0.4 | 100 ± 0.1 | 98 ± 0.0 | PM(F1)        | 97 † ± 0.5      | 97 † ± 0.6 | 100 † ± 0.0 |
|      | EAI       | 98 ± 0.4 | 99 ± 0.3  | 98 ± 0.1 | LR-L1(F1)     | 96 ± 0.9        | 97 ± 0.8   | 99 † ± 0.1  |
| EMB  | C1        | 92 ± 1.0 | 98 ± 0.9  | 95 ± 0.1 | PM(F2)        | 94 † ± 1.5      | 97 ± 0.7   | 99 † ± 0.1  |
|      | Beijing   | 90 ± 1.4 | 97 ± 0.7  | 93 ± 0.1 | RF(F2)        | 92 ± 1.8        | 97 ± 1.1   | 99 † ± 0.2  |
| RIF  | C1        | 88 ± 0.9 | 99 ± 0.3  | 94 ± 0.1 | PM(F2)        | 95 † ± 0.7      | 97 † ± 0.6 | 100 † ± 0.0 |
|      | Beijing   | 84 ± 1.3 | 100 ± 0.0 | 61 ± 4.6 | PM(F2)        | 96 † ± 0.8      | 98 † ± 0.6 | 67 † ± 5.0  |
| PZA  | C1        | 78 ± 1.4 | 100 ± 0.0 | 90 ± 0.0 | PM(F2)        | 86 ± 2.0        | 95 † ± 1.2 | 96 † ± 0.2  |
| MDR  | C1        | 85 ± 1.0 | 99 ± 0.3  | 91 ± 0.1 | PM(F2)        | 98 † ± 0.6      | 93 † ± 0.8 | 99 † ± 0.1  |
|      | Beijing   | 83 ± 1.4 | 100 ± 0.2 | 91 ± 0.1 | SVM-RBF(F3)   | 96 † ± 1.7      | 91 † ± 1.9 | 99 † ± 0.1  |

Supplement J

Table 18. The SNPs with high posterior probability using product of marginals for PZA and SM. The SNPs were selected with higher posterior in resistant class and lower posterior in susceptible class (For SM, the thresholds were set to 0.1 for both resistant and susceptible classes, respectively; For PZA, the thresholds were 0.05 for susceptible class and 0.08 for resistant class). We reported the SNPs pulled out from training model in descend order associated with the number of training samples that have the SNPs,  $n_{tot}$ , the number of training samples resistant to PZA that have the SNPs,  $n_{res}$ , and the posterior log probability in resistant class,  $p_{res}$ . The highlighted SNPs are known resistance-determinants for PZA and SM, respectively. We selected the model with the best test results to pull out the interested SNP, and reported the corresponding test performance. At this stage, no epistasis effect is considered. We note that these SNPs are statistically relevant for resistance classification instead of being associated to resistance genetically for the given drug.

| PZA                                 |                    | SM                                      |                    |
|-------------------------------------|--------------------|-----------------------------------------|--------------------|
| PM(F1)                              |                    | PM(F1)                                  |                    |
| Test [sen=100%, spec=100%,auc=100%] |                    | Test [Sen = 94%, Spec = 90%, AUC= 100%] |                    |
| SNPs                                | $n_{tot}(n_{res})$ | SNPs                                    | $n_{tot}(n_{res})$ |
| <b>pncA_H57D</b>                    | 9(9)               | gyrA_E21Q                               | 31(29)             |
| embB_G406S                          | 7(7)               | gyrA_G668D                              | 28(26)             |
| gidB_E92D                           | 9(8)               | gyrA_S95T                               | 27(25)             |
| <b>rpsA_A440T</b>                   | 7(7)               | katG_S315T                              | 22(22)             |
| embB_N13S                           | 7(7)               | rpoB_S450L                              | 16(16)             |
| iniA_N88S                           | 7(7)               | rpsL_K43R                               | 11(11)             |
| manB_-51_delAGTGAAGTGC              | 7(7)               | embB_Q497R                              | 5(5)               |
| gyrA_D94G                           | 7(6)               | gyrA_D94G                               | 6(5)               |
| ndh_R284W                           | 6(6)               | embB_G406S                              | 4(4)               |
| rpsL_K43R                           | 6(6)               | <b>rpsL_K88</b>                         | 3(3)               |
| katG_V473L                          | 5(5)               | manB_T-56N                              | 5(5)               |
| rpoB_I491F                          | 5(5)               |                                         |                    |
| ahpC_T-42C                          | 4(4)               |                                         |                    |
| rpoB_L452P                          | 4(4)               |                                         |                    |
| <b>pncA_L4S</b>                     | 3(3)               |                                         |                    |
| <b>pncA_V125G</b>                   | 3(3)               |                                         |                    |

**Supplement K**

Table 19. The selected SNPs based on variable importance measures in random forest given different drugs (we only list the selected SNPs within suspect genes for given drugs). The SNPs were selected using random forest with best classification on testing set. The highlighted SNPs are established resistance-determinant of given drugs.

| INH                | RIF               | EMB               | PZA                |
|--------------------|-------------------|-------------------|--------------------|
| <b>katG_S315T</b>  | <b>rpoB_S450L</b> | <b>embB_M306V</b> | <b>pncA_H57D</b>   |
| <b>fabG1_C-15T</b> | <b>rpoB_H445Y</b> | <b>embB_M306I</b> | <b>rpsL_A440T</b>  |
| katG_1899_insG     | <b>rpoB_H445D</b> | <b>embB_G406S</b> | <b>pncA_H57R</b>   |
| ahpC_T-42C         | <b>rpoB_H445N</b> | <b>embB_Q497R</b> | <b>pncA_A-11G</b>  |
| fabG1_G-47C        | rpoB_C-61T        |                   | <b>pncA_T-12C</b>  |
| ndh_G-70T          | <b>rpoB_I491F</b> |                   | <b>pncA_L4S</b>    |
| ahpC_G-88A         | <b>rpoB_S450W</b> |                   |                    |
| ahpC_G32D          | <b>rpoB_L452P</b> |                   |                    |
| <b>fabG1_T-8C</b>  | <b>rpoB_I480V</b> |                   |                    |
| katG_G-76A         | <b>rpoB_H445R</b> |                   |                    |
|                    | <b>rpoB_S450F</b> |                   |                    |
| MOX,OFX            | CIP               | SM                | MDR                |
| <b>gyrA_D94G</b>   | <b>gyrA_D94G</b>  | <b>rpsL_K43R</b>  | <b>rpoB_S450L</b>  |
| <b>gyrA_S91P</b>   | gyrA_A384V        | gidB_E92D         | <b>katG_S315T</b>  |
| <b>gyrA_A90V</b>   | gyrA_D641E        | <b>rpsL_K88R</b>  | <b>rpoB_H445Y</b>  |
|                    |                   | gidB_S100F        | ahpC_T-42          |
|                    |                   | rrs_C1257T        | rpoB_1299insC      |
|                    |                   |                   | <b>rpoB_S450F</b>  |
|                    |                   |                   | <b>rpoB_L452P</b>  |
|                    |                   |                   | <b>fabG1_C-15T</b> |
|                    |                   |                   | rpoB_C-61T         |
|                    |                   |                   | <b>rpoB_D435V</b>  |
|                    |                   |                   | <b>rpoB_I480V</b>  |
|                    |                   |                   | katG_V473L         |
